# Supplementary material
Source: Springer Nature journal article supplement (https://www.springermedizin.de/resource/supplementary/12936_2012_2666_MOESM1_ESM.pdf/9545018)

# Cases and number of calls received

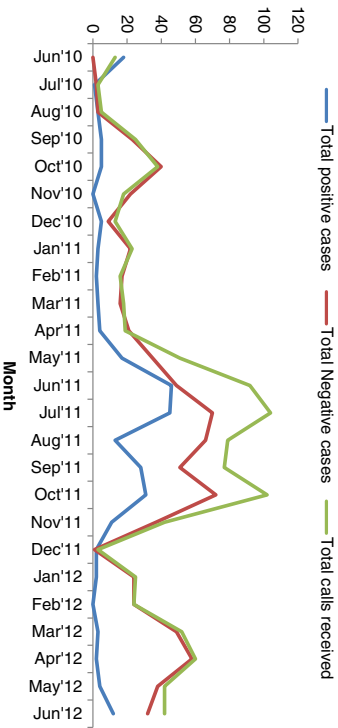

Supplement: MOESM1 [file 9545018]
